# Supplementary material
Source: Springer Nature journal article supplement (https://www.springermedizin.de/resource/supplementary/13058_2011_2901_MOESM8_ESM.pdf/9702820)

**A**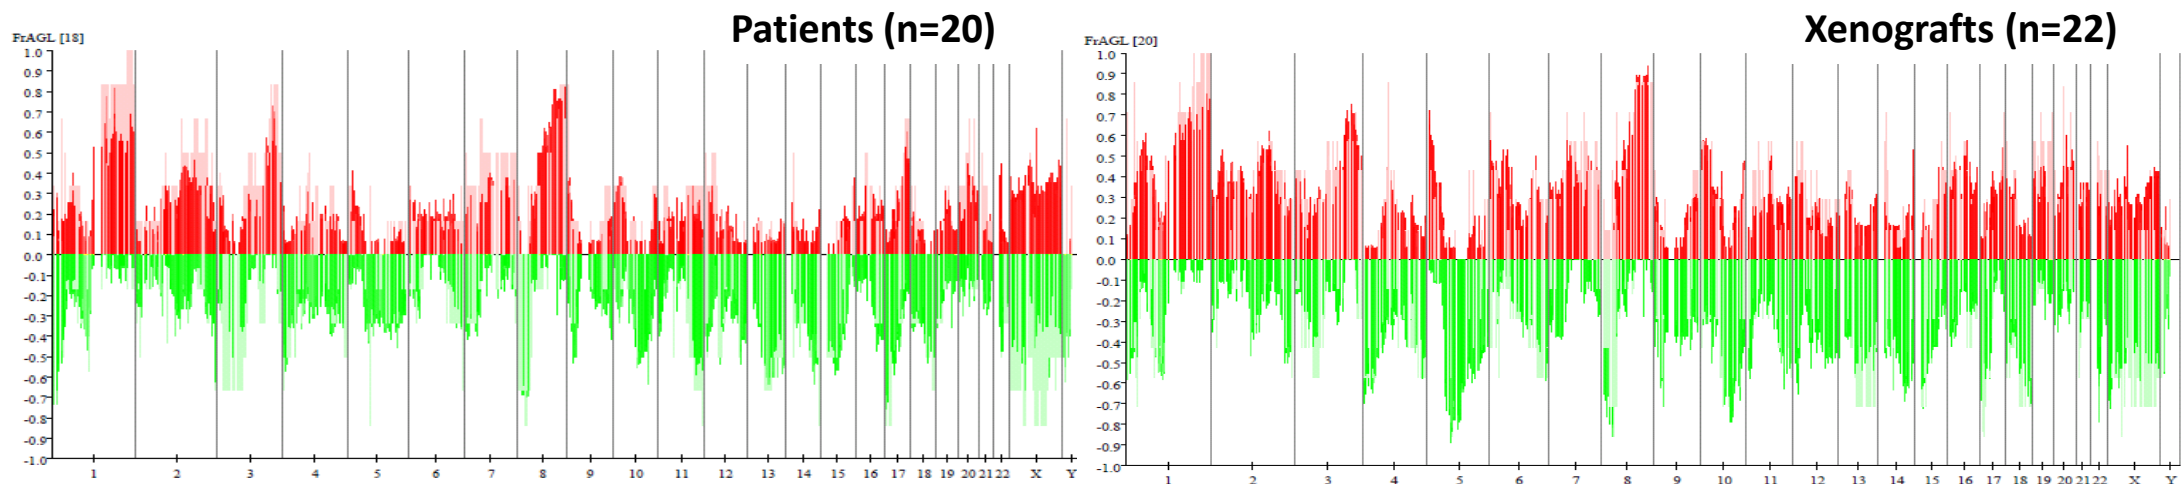**B**

Percentage unchanged

Percentage of loss

Percentage of gains

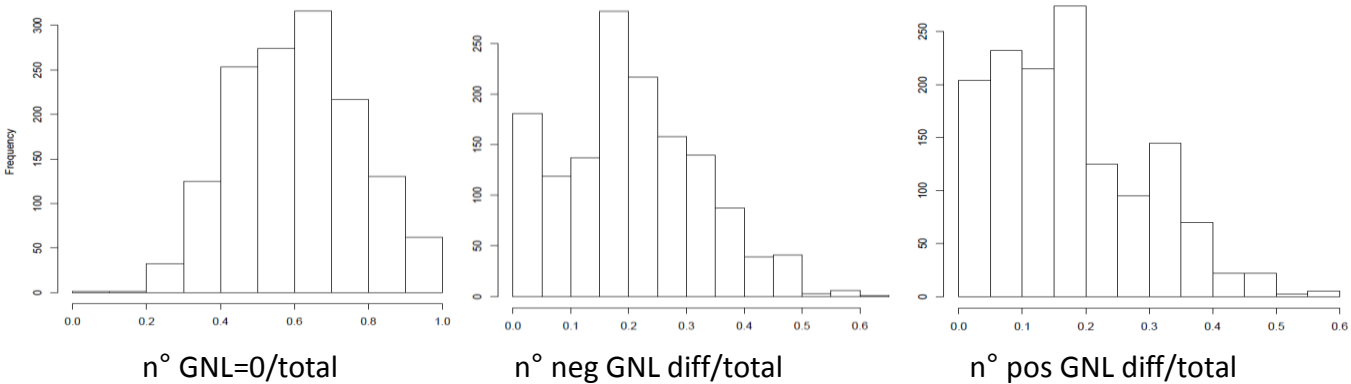**D**

Distribution of CNA loss along chromosomes (n=176)

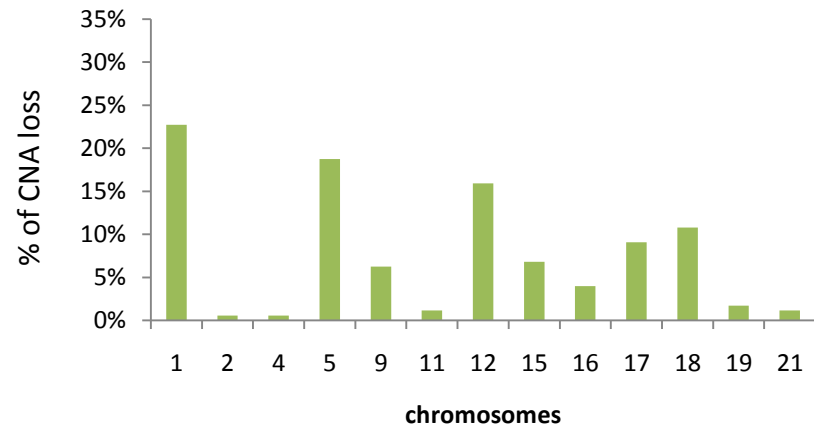**C**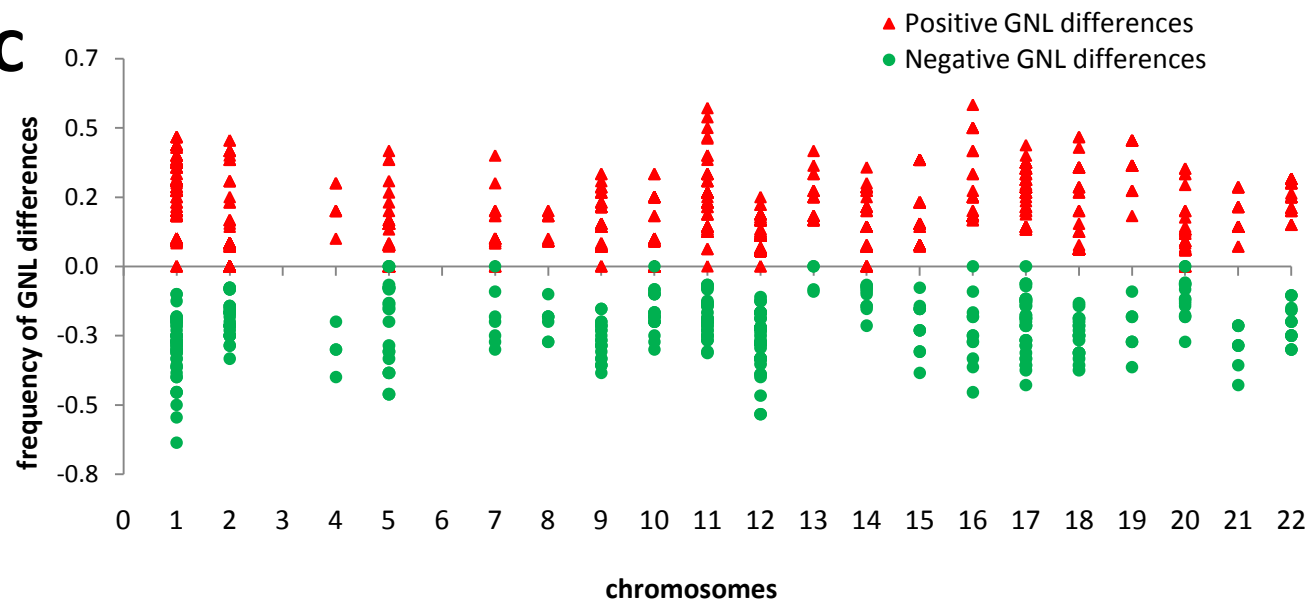

Distribution of CNA gains along chromosomes (n=202)

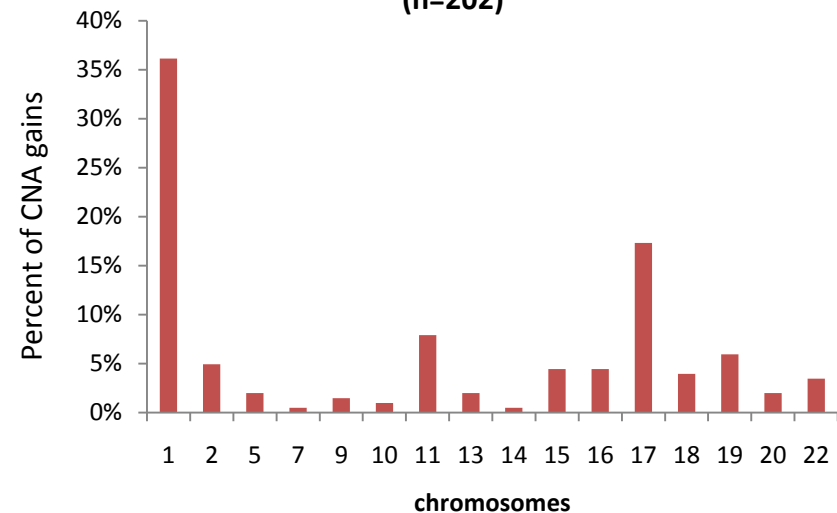

Supplement: MOESM8 [file 9702820]
